# Supplementary material
Source: Research Square preprint supplement (doi:10.21203/rs.3.rs-9878014/v1)
Supplement: Supplementary file 1 [file ec67de9e69cf465c51d29001.docx]

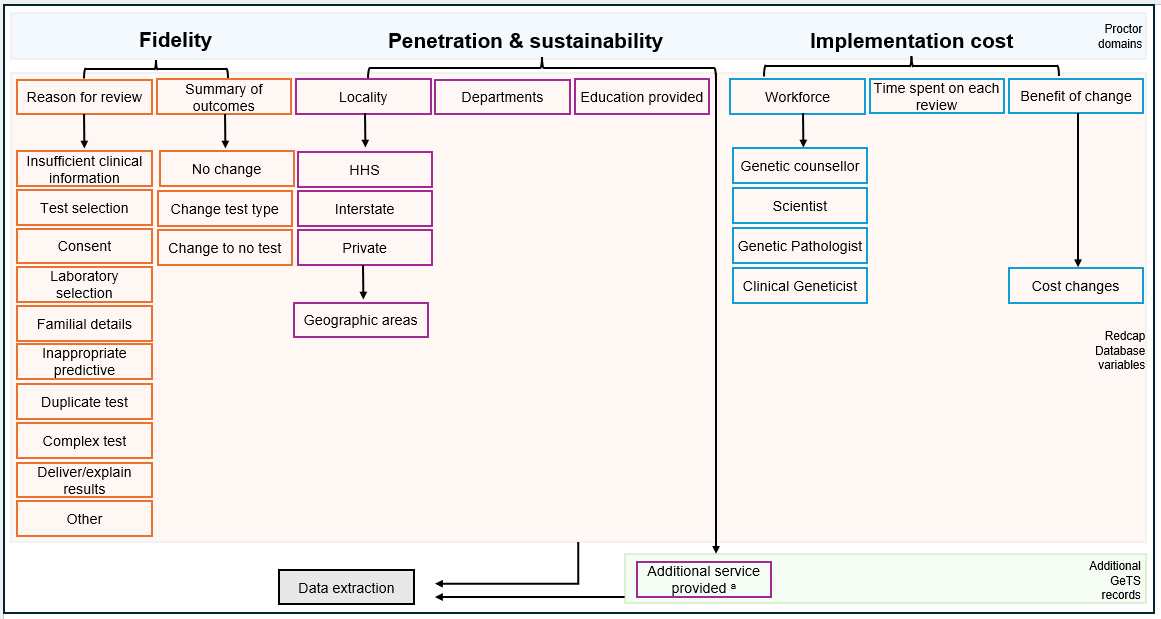


**Supplementary Figure 1.** Data sources mapped using Proctor Implementation Framework late phases16. Queensland, Australia, 2023-2025. HHS, Hospital and Health Services.

**a** Structured education, resource development, and laboratory process improvements.
